# Supplementary material for: Indigenous Yeasts from Rose Oil Distillation Wastewater and Their Capacity for Biotransformation of Phenolics
Source: MDPI journal article supplement (doi:10.3390/microorganisms11010201), 2023-01-12
Supplement: s1 [file s1]

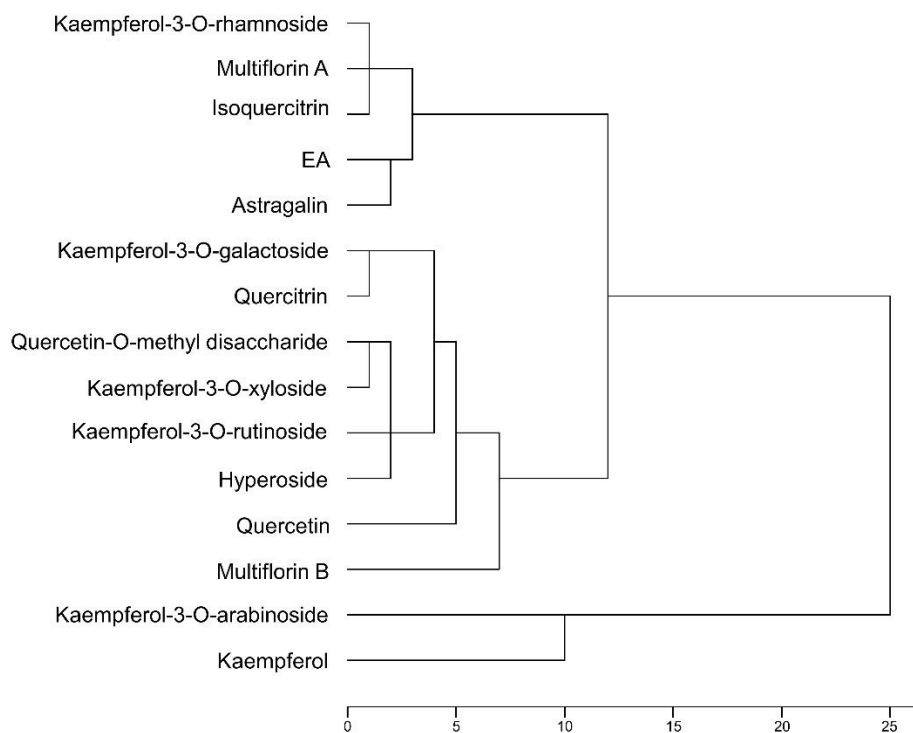

**Figure S2.** Hierarchical clustering of the RODW phenolic compounds according to their content changes following fermentation by the RODW-5 isolate. The dendrogram was constructed using the nearest neighbor algorithm and based on data for the relative changes of phenolic compounds in the extract of fermented RODW compared to a control extract of unfermented RODW, presented in Table 1.
