# Supplementary material for: Indigenous Yeasts from Rose Oil Distillation Wastewater and Their Capacity for Biotransformation of Phenolics
Source: MDPI journal article supplement (doi:10.3390/microorganisms11010201), 2023-01-12
Supplement: s1 [file s1]

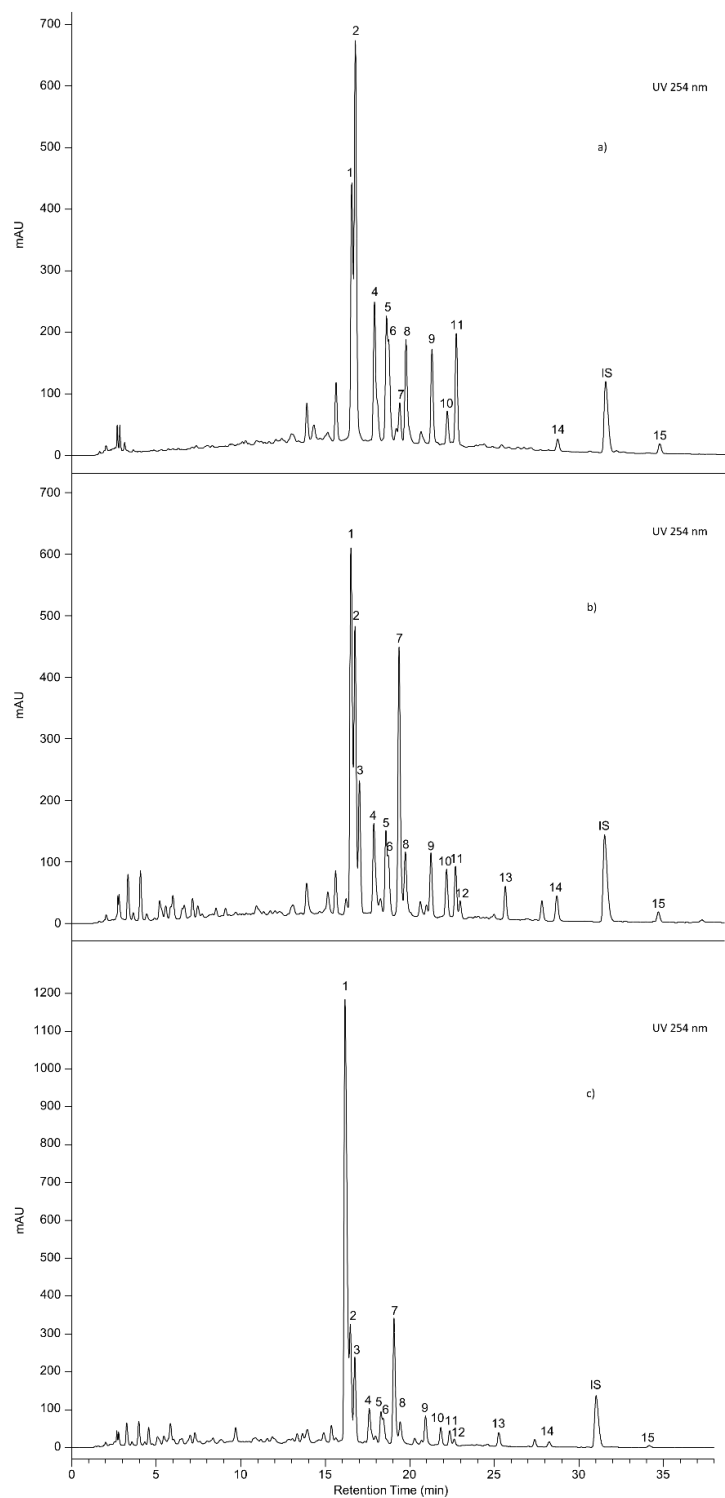

**Figure S1.** HPLC UV chromatograms of resin extract from RODW obtained after fermentation for a period of 136 hours by a) indigenous yeast isolate RODW-5, b) common yeast strain *Geotrichum fermentans* and c) control RODW without fermentation. Peak designation corresponds to the numbering in Table 1.
